# Supplementary material for: Measures of Oxidative Status Markers in Relation to Age, Sex, and Season in Sick and Healthy Captive Asian Elephants in Thailand
Source: MDPI journal article supplement (doi:10.3390/ani13091548), 2023-05-05
Supplement: s1 [file s1]

# SUPPLEMENTARY DATA

**Table S1.** Data on age and sex of sick and selected healthy elephants in this study.

| Sick elephants<br>(N=20) |              | Selected<br>healthy (N=30) |
|--------------------------|--------------|----------------------------|
| Conditions               | Age / sex    | Age / sex                  |
| EEHV-HD                  | 1y / male    | 2y / male                  |
| EEHV-HD                  | 2y / male    | 2y / male                  |
| EEHV-HD                  | 4y / male    | 2y / male                  |
|                          |              | 3y / male                  |
|                          |              | 3y / male                  |
|                          |              | 4y / male                  |
| EEHV-HD                  | 3y / female  | 3y / female                |
| EEHV-HD                  | 4y / female  | 4y / female                |
| MS                       | 5y / female  | 4y / female                |
|                          |              | 4y / female                |
|                          |              | 5y / female                |
|                          |              | 5y / female                |
| Eye                      | 11y / female | 9y / female                |
|                          |              | 10y / female               |
| MS                       | 14y / female | 15y / female               |
| GI                       | 24y / female | 23y / female               |
| MS                       | 31y / female | 30y / female               |
| GI                       | 35y / female | 33y / female               |
| Wound                    | 35y / female | 37y / female               |
| GI                       | 40y / female | 40y / female               |
|                          |              | 41y / female               |
| MS                       | 42y / female | 42y / female               |
|                          |              | 42y / female               |
| Eye                      | 47y / female | 46y / female               |
|                          |              | 46y / female               |
| Eye                      | 48y / female | 48y / female               |
| GI                       | 50y / female | 50y / female               |
| GI                       | 50y / female | 53y / female               |
| Wound                    | 50y / female | 54y / female               |
| Weakness                 | 55y / female | 60y / female               |

y: years; EEHV-HD: Elephant endotheliotropic herpesvirus hemorrhagic disease; MS: musculoskeletal problem; GI: gastrointestinal problem.

**Table S2.** Mean ( $\pm$ SD) and ranges of biomarker concentrations in selected age-, sex- or camp-matched healthy elephants compared to all healthy elephants in the study.

| <b>Biomarkers</b> | <b>Selected healthy elephants<br/>(N=30)</b> | <b>Other healthy elephants<br/>(N=107)</b> | <b>t statistic</b> | <b>P-value</b> |
|-------------------|----------------------------------------------|--------------------------------------------|--------------------|----------------|
| ROS (mg/l)        | 2.18 $\pm$ 0.14<br>(1.86-2.38)               | 2.18 $\pm$ 0.16<br>(1.61-2.53)             | 0.185              | 0.853          |
| MDA (nmol/ml)     | 1.43 $\pm$ 0.35<br>(0.90-2.49)               | 1.78 $\pm$ 0.77<br>(0.75-3.28)             | 4.544              | 0.121          |
| Albumin (g/dl)    | 3.23 $\pm$ 0.33<br>(2.70-3.90)               | 3.35 $\pm$ 0.36<br>(2.10-4.10)             | 1.665              | 0.098          |
| GPx (U/l)         | 1.13 $\pm$ 0.47<br>(0.30-2.09)               | 1.16 $\pm$ 0.58<br>(0.23-3.04)             | 0.245              | 0.806          |
| Catalase (U/ml)   | 13.25 $\pm$ 4.85<br>(6.33-25.64)             | 12.99 $\pm$ 5.73<br>(3.28-28.23)           | -0.231             | 0.817          |
| fGCM (ng/g)       | 55.43 $\pm$ 19.01<br>(22.15-103.23)          | 50.83 $\pm$ 17.15<br>(16.94-106.08)        | -1.038             | 0.302          |

**Table S3.** Mean ( $\pm$  SD) and ranges of biomarker concentrations in sick and elephant endotheliotropic herpesvirus-hemorrhagic disease (EEHV-HD)-infected elephants compared to age-, sex- or camp-matched healthy elephants.

| Biomarkers               | Reference range | Selected healthy elephants (n=30) <sup>1</sup> | Weakness (N=1) | Wound (N=2)                       | GI <sup>2</sup> (N=5)                        | Eye (N=3)                                    | MS <sup>3</sup> (N=4)                        | EEHV-HD (N=5)                               | H statistic | P-value |
|--------------------------|-----------------|------------------------------------------------|----------------|-----------------------------------|----------------------------------------------|----------------------------------------------|----------------------------------------------|---------------------------------------------|-------------|---------|
| ROS (mg/l)               | 1.91 – 2.47     | 2.18 $\pm$ 0.14<br>(1.86-2.38)                 | 2.24           | 1.92 $\pm$ 0.25<br>(1.72-2.08)    | 2.10 $\pm$ 0.15<br>(1.97-2.34)               | 2.11 $\pm$ 0.13<br>(1.97-2.24)               | 2.16 $\pm$ 0.15<br>(2.02-2.37)               | 2.19 $\pm$ 0.16<br>(1.97-2.38)              | 5.48        | 0.483   |
| MDA (nmol/ml)            | 0.93 – 2.49     | 1.43 $\pm$ 0.35 <sup>a</sup><br>(0.90-2.09)    | 1.49           | 1.87 $\pm$ 0.11<br>(1.79-1.94)    | 2.00 $\pm$ 0.57 <sup>ab</sup><br>(1.34-2.84) | 2.63 $\pm$ 1.50 <sup>ab</sup><br>(1.49-4.33) | 2.68 $\pm$ 1.06 <sup>ab</sup><br>(1.79-3.88) | 3.55 $\pm$ 0.29 <sup>b</sup><br>(3.28-4.03) | 24.44       | <0.01** |
| Albumin (g/dl)           | 2.73 – 3.96     | 3.23 $\pm$ 0.33 <sup>a</sup><br>(2.70-3.90)    | 1.10           | 3.45 $\pm$ 0.07<br>(3.40-3.50)    | 3.00 $\pm$ 0.26 <sup>ab</sup><br>(2.70-3.30) | 3.13 $\pm$ 0.21 <sup>ab</sup><br>(2.90-3.30) | 3.20 $\pm$ 0.26 <sup>ab</sup><br>(3.00-3.50) | 2.20 $\pm$ 0.29 <sup>b</sup><br>(1.90-2.50) | 16.14       | 0.013*  |
| GPx (U/l)                | 0.14 – 2.08     | 1.13 $\pm$ 0.47<br>(0.30-2.09)                 | 0.71           | 0.69 $\pm$ 0.94<br>(0.03-1.36)    | 1.04 $\pm$ 0.23<br>(0.80-1.32)               | 0.86 $\pm$ 0.21<br>(0.65-1.07)               | 0.87 $\pm$ 0.52<br>(0.50-1.64)               | 1.76 $\pm$ 0.40<br>(1.24-2.25)              | 10.92       | 0.091   |
| Catalase (U/ml)          | 2.99 – 21.86    | 13.25 $\pm$ 4.85<br>(6.33-25.64)               | 12.02          | 7.56 $\pm$ 3.43<br>(5.13-9.99)    | 16.73 $\pm$ 7.52<br>(6.01-25.51)             | 15.28 $\pm$ 5.53<br>(11.29-21.61)            | 14.67 $\pm$ 1.29<br>(12.76-15.57)            | 23.81 $\pm$ 10.76<br>(12.52-41.78)          | 10.71       | 0.098   |
| fGCM <sup>4</sup> (ng/g) | 22.23 – 82.70   | 55.43 $\pm$ 19.01<br>(22.15-79.40)             | 273.86         | 55.69 $\pm$ 5.64<br>(51.70-59.68) | 95.14 $\pm$ 53.81<br>(32.30-161.11)          | 36.09 $\pm$ 1.69<br>(34.90-37.28)            | 51.64 $\pm$ 26.68<br>(32.78-70.51)           | 42.00 $\pm$ 13.63<br>(26.48-52.03)          | 8.79        | 0.185   |

<sup>a,b</sup>Different superscripts indicate a significant difference at  $P < 0.05$ . Weakness and Wound categories were excluded from the analysis due to low N numbers.

<sup>1</sup>Age-, sex- and camp-matched

<sup>2</sup>Gastrointestinal system

<sup>3</sup>Musculoskeletal system

<sup>4</sup>Fecal glucocorticoid metabolites

Asterisks indicated the significant levels at  $p < 0.05$  (\*) and  $p < 0.01$  (\*\*)

**Table S4.** Generalized linear model analyses of variables associated with serum reactive oxygen species (ROS) concentrations.

| Variables                 |                            | N  | Estimate    | SE    | t value | P       |
|---------------------------|----------------------------|----|-------------|-------|---------|---------|
|                           | (intercept)                |    | 2.207       | 0.049 | 44.914  | <0.01** |
| Age group                 | Juvenile                   | 45 | (Reference) |       |         |         |
|                           | Subadult                   | 36 | 0.109       | 0.085 | 1.282   | 0.202   |
|                           | Adult                      | 45 | 0.514       | 0.200 | 2.564   | 0.011*  |
|                           | Aged                       | 11 | 0.300       | 0.138 | 2.158   | 0.032*  |
| Sex                       | Male                       | 45 | (Reference) |       |         |         |
|                           | Female                     | 92 | -0.148      | 0.109 | -1.348  | 0.180   |
| Season                    | Summer                     | 33 | (Reference) |       |         |         |
|                           | Rainy                      | 53 | -0.104      | 0.062 | -1.663  | 0.098   |
|                           | Winter                     | 51 | 0.023       | 0.094 | 0.250   | 0.803   |
| Age group x Sex           | Juvenile x Male            | 24 | (Reference) |       |         |         |
|                           | Subadult x Female          | 23 | 0.163       | 0.144 | 1.133   | 0.259   |
|                           | Adult x Female             | 37 | -0.221      | 0.170 | -1.302  | 0.195   |
|                           | Aged x Female              | 11 | N/A         | N/A   | N/A     | N/A     |
| Age group x Season        | Juvenile x Summer          | 10 | (Reference) |       |         |         |
|                           | Subadult x Rainy           | 22 | -0.169      | 0.107 | -1.577  | 0.117   |
|                           | Adult x Rainy              | -  | N/A         | N/A   | N/A     | N/A     |
|                           | Aged x Rainy               | -  | N/A         | N/A   | N/A     | N/A     |
|                           | Subadult x Winter          | 5  | -0.064      | 0.152 | -0.424  | 0.672   |
|                           | Adult x Winter             | 33 | -0.556      | 0.177 | -3.145  | 0.002** |
|                           | Aged x Winter              | 9  | -0.509      | 0.202 | -2.524  | 0.013*  |
|                           |                            |    |             |       |         |         |
| Sex x Season              | Male x Summer              | 12 | (Reference) |       |         |         |
|                           | Female x Rainy             | 33 | 0.143       | 0.121 | 1.185   | 0.238   |
|                           | Female x Winter            | 38 | 0.343       | 0.194 | 1.766   | 0.080   |
| Age groups x Sex x Season | Juvenile x Male x Summer   | 8  | (Reference) |       |         |         |
|                           | Subadult x Female x Rainy  | 15 | -0.047      | 0.165 | -0.285  | 0.776   |
|                           | Adult x Female x Rainy     | -  | N/A         | N/A   | N/A     | N/A     |
|                           | Aged x Female x Rainy      | -  | N/A         | N/A   | N/A     | N/A     |
|                           | Subadult x Female x Winter | 3  | -0.422      | 0.250 | -1.687  | 0.094   |
|                           | Adult x Female x Winter    | 25 | N/A         | N/A   | N/A     | N/A     |
|                           | Aged x Female x Winter     | 9  | N/A         | N/A   | N/A     | N/A     |

Asterisks indicated the significant levels at  $p < 0.05$  (\*) and  $p < 0.01$  (\*\*).

**Table S5.** Generalized linear model analyses of variables associated with serum malondialdehyde (MDA) concentrations.

| Variables                 |                            | N  | Estimate    | SE    | t value | P       |
|---------------------------|----------------------------|----|-------------|-------|---------|---------|
|                           | (intercept)                |    | 1.998       | 0.156 | 12.819  | <0.01** |
| Age group                 | Juvenile                   | 45 | (Reference) |       |         |         |
|                           | Subadult                   | 36 | -0.321      | 0.270 | -1.190  | 0.236   |
|                           | Adult                      | 45 | -0.894      | 0.636 | -1.407  | 0.162   |
|                           | Aged                       | 11 | -0.600      | 0.441 | -1.361  | 0.176   |
| Sex                       | Male                       | 45 | (Reference) |       |         |         |
|                           | Female                     | 92 | 0.391       | 0.348 | 1.122   | 0.264   |
| Season                    | Summer                     | 33 | (Reference) |       |         |         |
|                           | Rainy                      | 53 | -0.162      | 0.198 | -0.820  | 0.413   |
|                           | Winter                     | 51 | 0.091       | 0.298 | 0.306   | 0.760   |
| Age group x Sex           | Juvenile x Male            | 24 | (Reference) |       |         |         |
|                           | Subadult x Female          | 23 | 0.081       | 0.457 | 0.178   | 0.859   |
|                           | Adult x Female             | 37 | 0.244       | 0.539 | 0.454   | 0.651   |
|                           | Aged x Female              | 11 | N/A         | N/A   | N/A     | N/A     |
| Age group x Season        | Juvenile x Summer          | 10 | (Reference) |       |         |         |
|                           | Subadult x Rainy           | 22 | 0.532       | 0.340 | 1.565   | 0.120   |
|                           | Adult x Rainy              | -  | N/A         | N/A   | N/A     | N/A     |
|                           | Aged x Rainy               | -  | N/A         | N/A   | N/A     | N/A     |
|                           | Subadult x Winter          | 5  | 0.471       | 0.485 | 0.972   | 0.333   |
|                           | Adult x Winter             | 33 | 0.501       | 0.562 | 0.892   | 0.374   |
|                           | Aged x Winter              | 9  | 0.550       | 0.641 | 0.858   | 0.392   |
|                           |                            |    |             |       |         |         |
| Sex x Season              | Male x Summer              | 12 | (Reference) |       |         |         |
|                           | Female x Rainy             | 33 | -0.712      | 0.384 | -1.856  | 0.065   |
|                           | Female x Winter            | 38 | -0.841      | 0.617 | -1.363  | 0.175   |
| Age groups x Sex x Season | Juvenile x Male x Summer   | 8  | (Reference) |       |         |         |
|                           | Subadult x Female x Rainy  | 15 | 0.093       | 0.524 | 0.177   | 0.860   |
|                           | Adult x Female x Rainy     | -  | N/A         | N/A   | N/A     | N/A     |
|                           | Aged x Female x Rainy      | -  | N/A         | N/A   | N/A     | N/A     |
|                           | Subadult x Female x Winter | 3  | 0.318       | 0.794 | 0.401   | 0.688   |
|                           | Adult x Female x Winter    | 25 | N/A         | N/A   | N/A     | N/A     |
|                           | Aged x Female x Winter     | 9  | N/A         | N/A   | N/A     | N/A     |

Asterisks indicated the significant levels at  $p < 0.05$  (\*) and  $p < 0.01$  (\*\*).

**Table S6.** Generalized linear model analyses of variables associated with serum albumin concentrations.

| Variables                 |                            | N  | Estimate    | SE    | t value | P       |
|---------------------------|----------------------------|----|-------------|-------|---------|---------|
|                           | (intercept)                |    | 3.187       | 0.119 | 26.794  | <0.01** |
| Age group                 | Juvenile                   | 45 | (Reference) |       |         |         |
|                           | Subadult                   | 36 | 0.287       | 0.206 | 1.395   | 0.165   |
|                           | Adult                      | 45 | 0.485       | 0.485 | 1.000   | 0.319   |
|                           | Aged                       | 11 | 0.850       | 0.336 | 2.526   | 0.012*  |
| Sex                       | Male                       | 45 | (Reference) |       |         |         |
|                           | Female                     | 92 | -0.287      | 0.266 | -1.081  | 0.282   |
| Season                    | Summer                     | 33 | (Reference) |       |         |         |
|                           | Rainy                      | 53 | 0.112       | 0.151 | 0.744   | 0.458   |
|                           | Winter                     | 51 | 0.212       | 0.227 | 0.933   | 0.353   |
| Age group x Sex           | Juvenile x Male            | 24 | (Reference) |       |         |         |
|                           | Subadult x Female          | 23 | 0.192       | 0.348 | 0.552   | 0.582   |
|                           | Adult x Female             | 37 | 0.014       | 0.412 | 0.035   | 0.972   |
|                           | Aged x Female              | 11 | N/A         | N/A   | N/A     | N/A     |
| Age group x Season        | Juvenile x Summer          | 10 | (Reference) |       |         |         |
|                           | Subadult x Rainy           | 22 | -0.116      | 0.259 | -0.447  | 0.655   |
|                           | Adult x Rainy              | -  | N/A         | N/A   | N/A     | N/A     |
|                           | Aged x Rainy               | -  | N/A         | N/A   | N/A     | N/A     |
|                           | Subadult x Winter          | 5  | 0.162       | 0.369 | 0.439   | 0.661   |
|                           | Adult x Winter             | 33 | -0.348      | 0.428 | -0.812  | 0.418   |
|                           | Aged x Winter              | 9  | -0.361      | 0.489 | -0.739  | 0.461   |
| Sex x Season              | Male x Summer              | 12 | (Reference) |       |         |         |
|                           | Female x Rainy             | 33 | 0.171       | 0.293 | 0.583   | 0.561   |
|                           | Female x Winter            | 38 | -0.112      | 0.471 | -0.239  | 0.811   |
| Age groups x Sex x Season | Juvenile x Male x Summer   | 8  | (Reference) |       |         |         |
|                           | Subadult x Female x Rainy  | 15 | -0.107      | 0.400 | -0.268  | 0.789   |
|                           | Adult x Female x Rainy     | -  | N/A         | N/A   | N/A     | N/A     |
|                           | Aged x Female x Rainy      | -  | N/A         | N/A   | N/A     | N/A     |
|                           | Subadult x Female x Winter | 3  | -0.409      | 0.606 | -0.675  | 0.501   |
|                           | Adult x Female x Winter    | 25 | N/A         | N/A   | N/A     | N/A     |
|                           | Aged x Female x Winter     | 9  | N/A         | N/A   | N/A     | N/A     |

Asterisks indicated the significant levels at  $p < 0.05$  (\*) and  $p < 0.01$  (\*\*).

**Table S7.** Generalized linear model analyses of variables associated with serum glutathione peroxidase activity.

| Variables                 |                            | N  | Estimate    | SE    | t value | P       |
|---------------------------|----------------------------|----|-------------|-------|---------|---------|
|                           | (intercept)                |    | 1.123       | 0.189 | 5.930   | <0.01** |
| Age group                 | Juvenile                   | 45 | (Reference) |       |         |         |
|                           | Subadult                   | 36 | -0.059      | 0.328 | -0.179  | 0.858   |
|                           | Adult                      | 45 | -0.464      | 0.773 | -0.600  | 0.549   |
|                           | Aged                       | 11 | -0.173      | 0.536 | -0.324  | 0.747   |
| Sex                       | Male                       | 45 | (Reference) |       |         |         |
|                           | Female                     | 92 | 0.656       | 0.423 | 1.550   | 0.124   |
| Season                    | Summer                     | 33 | (Reference) |       |         |         |
|                           | Rainy                      | 53 | 0.236       | 0.241 | 0.983   | 0.328   |
|                           | Winter                     | 51 | -0.425      | 0.363 | -1.173  | 0.243   |
| Age group x Sex           | Juvenile x Male            | 24 | (Reference) |       |         |         |
|                           | Subadult x Female          | 23 | -0.251      | 0.556 | -0.452  | 0.652   |
|                           | Adult x Female             | 37 | -0.036      | 0.656 | -0.055  | 0.956   |
|                           | Aged x Female              | 11 | N/A         | N/A   | N/A     | N/A     |
| Age group x Season        | Juvenile x Summer          | 10 | (Reference) |       |         |         |
|                           | Subadult x Rainy           | 22 | -0.429      | 0.413 | -1.039  | 0.301   |
|                           | Adult x Rainy              | -  | N/A         | N/A   | N/A     | N/A     |
|                           | Aged x Rainy               | -  | N/A         | N/A   | N/A     | N/A     |
|                           | Subadult x Winter          | 5  | 0.527       | 0.589 | 0.895   | 0.372   |
|                           | Adult x Winter             | 33 | 0.711       | 0.683 | 1.041   | 0.299   |
|                           | Aged x Winter              | 9  | 0.272       | 0.778 | 0.350   | 0.727   |
| Sex x Season              | Male x Summer              | 12 | (Reference) |       |         |         |
|                           | Female x Rainy             | 33 | -0.948      | 0.466 | -2.034  | 0.044*  |
|                           | Female x Winter            | 38 | -0.546      | 0.749 | -0.729  | 0.467   |
| Age groups x Sex x Season | Juvenile x Male x Summer   | 8  | (Reference) |       |         |         |
|                           | Subadult x Female x Rainy  | 15 | 1.214       | 0.638 | 1.904   | 0.059   |
|                           | Adult x Female x Rainy     | -  | N/A         | N/A   | N/A     | N/A     |
|                           | Aged x Female x Rainy      | -  | N/A         | N/A   | N/A     | N/A     |
|                           | Subadult x Female x Winter | 3  | -0.012      | 0.965 | -0.013  | 0.989   |
|                           | Adult x Female x Winter    | 25 | N/A         | N/A   | N/A     | N/A     |
|                           | Aged x Female x Winter     | 9  | N/A         | N/A   | N/A     | N/A     |

Asterisks indicated the significant levels at  $p < 0.05$  (\*) and  $p < 0.01$  (\*\*).

**Table S8.** Generalized linear model analyses of variables associated with serum catalase activity.

| Variables                 |                            | N  | Estimate    | SE    | t value | P       |
|---------------------------|----------------------------|----|-------------|-------|---------|---------|
| Age group                 | (intercept)                |    | 10.239      | 1.674 | 6.117   | <0.01** |
|                           | Juvenile                   | 45 | (Reference) |       |         |         |
|                           | Subadult                   | 36 | -2.913      | 2.899 | -1.005  | 0.317   |
|                           | Adult                      | 45 | -3.538      | 6.831 | -0.518  | 0.605   |
| Sex                       | Aged                       | 11 | -5.525      | 4.735 | -1.167  | 0.245   |
|                           | Male                       | 45 | (Reference) |       |         |         |
|                           | Female                     | 92 | 2.457       | 3.743 | 0.656   | 0.513   |
| Season                    | Summer                     | 33 | (Reference) |       |         |         |
|                           | Rainy                      | 53 | 2.041       | 2.127 | 0.960   | 0.339   |
|                           | Winter                     | 51 | 2.568       | 3.205 | 0.801   | 0.424   |
| Age group x Sex           | Juvenile x Male            | 24 | (Reference) |       |         |         |
|                           | Subadult x Female          | 23 | 2.052       | 4.909 | 0.418   | 0.676   |
|                           | Adult x Female             | 37 | -2.030      | 5.795 | -0.350  | 0.727   |
|                           | Aged x Female              | 11 | N/A         | N/A   | N/A     | N/A     |
| Age group x Season        | Juvenile x Summer          | 10 | (Reference) |       |         |         |
|                           | Subadult x Rainy           | 22 | 3.924       | 3.651 | 1.075   | 0.284   |
|                           | Adult x Rainy              | -  | N/A         | N/A   | N/A     | N/A     |
|                           | Aged x Rainy               | -  | N/A         | N/A   | N/A     | N/A     |
|                           | Subadult x Winter          | 5  | 14.642      | 5.204 | 2.813   | <0.01** |
|                           | Adult x Winter             | 33 | 9.188       | 6.032 | 1.523   | 0.130   |
|                           | Aged x Winter              | 9  | 7.317       | 6.879 | 1.064   | 0.289   |
| Sex x Season              | Male x Summer              | 12 | (Reference) |       |         |         |
|                           | Female x Rainy             | 33 | -3.105      | 4.121 | -0.754  | 0.452   |
|                           | Female x Winter            | 38 | -3.098      | 6.625 | -0.468  | 0.641   |
| Age groups x Sex x Season | Juvenile x Male x Summer   | 8  | (Reference) |       |         |         |
|                           | Subadult x Female x Rainy  | 15 | 0.212       | 5.636 | 0.038   | 0.969   |
|                           | Adult x Female x Rainy     | -  | N/A         | N/A   | N/A     | N/A     |
|                           | Aged x Female x Rainy      | -  | N/A         | N/A   | N/A     | N/A     |
|                           | Subadult x Female x Winter | 3  | -13.153     | 8.524 | -1.543  | 0.125   |
|                           | Adult x Female x Winter    | 25 | N/A         | N/A   | N/A     | N/A     |
|                           | Aged x Female x Winter     | 9  | N/A         | N/A   | N/A     | N/A     |

Asterisks indicated the significant levels at  $p < 0.05$  (\*) and  $p < 0.01$  (\*\*).



**Table S9.** Generalized linear model analyses of variables associated with fGCM concentrations.

| Variables                 |                            | N  | Estimate    | SE     | t value | P       |
|---------------------------|----------------------------|----|-------------|--------|---------|---------|
| Age group                 | (intercept)                |    | 36.075      | 8.786  | 4.106   | <0.01** |
|                           | Juvenile                   | 17 | (Reference) |        |         |         |
|                           | Subadult                   | 16 | 4.984       | 13.421 | 0.371   | 0.711   |
|                           | Adult                      | 41 | -32.551     | 28.462 | -1.144  | 0.257   |
| Sex                       | Aged                       | 11 | -18.894     | 36.581 | -0.517  | 0.607   |
|                           | Male                       | 22 | (Reference) |        |         |         |
| Season                    | Female                     | 63 | 29.492      | 33.265 | 0.887   | 0.378   |
|                           | Summer                     | 21 | (Reference) |        |         |         |
|                           | Rainy                      | 16 | 12.466      | 19.647 | 0.635   | 0.528   |
| Age group x Sex           | Winter                     | 48 | 23.740      | 15.218 | 1.560   | 0.123   |
|                           | Juvenile x Male            | 7  | (Reference) |        |         |         |
|                           | Subadult x Female          | 9  | -5.461      | 30.437 | -0.179  | 0.858   |
|                           | Adult x Female             | 33 | 6.379       | 22.675 | 0.281   | 0.779   |
| Age group x Season        | Aged x Female              | 11 | N/A         | N/A    | N/A     | N/A     |
|                           | Juvenile x Summer          | 4  | (Reference) |        |         |         |
|                           | Subadult x Rainy           | 6  | 11.061      | 25.364 | 0.436   | 0.664   |
|                           | Adult x Rainy              | -  | N/A         | N/A    | N/A     | N/A     |
|                           | Aged x Rainy               | -  | N/A         | N/A    | N/A     | N/A     |
|                           | Subadult x Winter          | 3  | -9.198      | 22.112 | -0.416  | 0.679   |
|                           | Adult x Winter             | 33 | 30.336      | 30.428 | 0.997   | 0.322   |
|                           | Aged x Winter              | 9  | 20.511      | 32.614 | 0.629   | 0.531   |
| Sex x Season              | Male x Summer              | 7  | (Reference) |        |         |         |
|                           | Female x Rainy             | 13 | -19.681     | 38.074 | -0.517  | 0.607   |
|                           | Female x Winter            | 36 | -40.665     | 25.364 | -1.603  | 0.113   |
| Age groups x Sex x Season | Juvenile x Male x Summer   | 4  | (Reference) |        |         |         |
|                           | Subadult x Female x Rainy  | 4  | -12.299     | 38.744 | -0.317  | 0.752   |
|                           | Adult x Female x Rainy     | -  | N/A         | N/A    | N/A     | N/A     |
|                           | Aged x Female x Rainy      | -  | N/A         | N/A    | N/A     | N/A     |
|                           | Subadult x Female x Winter | 1  | N/A         | N/A    | N/A     | N/A     |
|                           | Adult x Female x Winter    | 25 | N/A         | N/A    | N/A     | N/A     |
|                           | Aged x Female x Winter     | 9  | N/A         | N/A    | N/A     | N/A     |

Asterisks indicated the significant levels at  $p < 0.05$  (\*) and  $p < 0.01$  (\*\*).

**Table S10.** Mean ( $\pm$  SD) and ranges of blood parameters in sick elephants in different disease categories as compared to the reference ranges for healthy elephants.

| Parameter       |                                             | Reference Range<br>(N=137) | Disease conditions (N=20) |                                      |                                        |                                      |                                      |                                         |
|-----------------|---------------------------------------------|----------------------------|---------------------------|--------------------------------------|----------------------------------------|--------------------------------------|--------------------------------------|-----------------------------------------|
|                 |                                             |                            | Weakness<br>(N=1)         | Wound<br>(N=2)                       | Gastrointestinal<br>(N=5)              | Eye<br>(N=3)                         | Musculoskeletal<br>(N=4)             | EEHV-HD<br>(N=5)                        |
| RBC             | PCV (%)                                     | 27.62 - 47.52              | 27                        | 34.50 ± 0.71<br>(34-35)              | 32.45 ± 1.71<br>(30-34)                | 33.50 ± 2.12<br>(32-35)              | 33.67 ± 0.58<br>(33-34)              | 35.80 ± 7.56<br>(26-44)                 |
|                 | Hemoglobin (g/dl)                           | 10.29 – 16.10              | 9.9                       | 12.55 ± 0.49<br>(12.20-12.90)        | 11.65 ± 0.42<br>(11.20-12.10)          | 11.85 ± 0.35<br>(11.60-12.10)        | 12.40 ± 0.10<br>(12.30-12.50)        | 12.34 ± 3.06<br>(9.20-14.80)            |
|                 | RBC count (X 10 <sup>6</sup> cells/μl)      | 2.39 – 3.91                | 2.23                      | 2.75 ± 0.04<br>(2.72-2.78)           | 2.69 ± 0.17<br>(2.49-2.71)             | 2.70 ± 0.13<br>(2.61-2.80)           | 2.84 ± 0.14<br>(2.75-3.00)           | 3.24 ± 0.65<br>(2.87-3.97)              |
|                 | MCV (fl)                                    | 106.30 – 129.08            | 122.8                     | 126.00 ± 0.42<br>(125.70-126.30)     | 120.70 ± 3.49<br>(115.50-123.00)       | 123.55 ± 1.48<br>(122.50-124.60)     | 119.17 ± 4.46<br>(114.50-123.40)     | 110.98 ± 3.43<br>(105.20-114.30)        |
|                 | MCHC (g/dl)                                 | 34.62 – 36.82              | 36.1                      | 36.30 ± 0.85<br>(35.70-36.90)        | 36.05 ± 1.24<br>(34.70-37.70)          | 35.50 ± 1.13<br>(34.70-36.30)        | 36.67 ± 0.42<br>(36.20-37.00)        | 34.20 ± 2.83<br>(30.50-36.40)           |
| WBC             | WBC count (cells/μl)                        | 7,130.58 – 20,368.19       | 12,580                    | 10,100.00 ± 282.84<br>(9,900-10,300) | 14,602.50 ± 5,776.03<br>(8,680-21,630) | 14,180 ± 5,289.16<br>(10,440-17,920) | 10,020 ± 4,309.65<br>(5,170-13,410)  | 18,950.00 ± 11,131.23<br>(9,700-36,320) |
|                 | Heterophil (cells/μl)                       | 974.61 – 5,383.52          | 5,787                     | 2,687.50 ± 860.55<br>(2,079-3,296)   | 4,211.25 ± 2,812.71<br>(1,389-7,595)   | 3,984.50 ± 566.39<br>(3,584-4,385)   | 2,698.00 ± 1,746.86<br>(1,448-4,694) | 9,502.80 ± 4,755.95<br>(5,044-15,254)   |
|                 | Lymphocyte (cells/μl)                       | 686.23 – 9,985.99          | 2,893                     | 3,693.00 ± 3,037.73<br>(1,545-5,841) | 4,588.00 ± 851.56<br>(3,506-5,468)     | 5,232.00 ± 2,231.63<br>(3,654-6,810) | 3,086.00 ± 1,576.15<br>(1,448-4,592) | 5,909.40 ± 2,778.33<br>(3,502-10,170)   |
|                 | Monocyte (cells/μl)                         | 422.91 – 7,459.65          | 3,774                     | 3,608.50 ± 2,443.05<br>(1,881-5,336) | 4,393.00 ± 2,192.23<br>(1,649-6,884)   | 4,307.00 ± 3,285.22<br>(1,984-6,630) | 4,057.33 ± 1,544.47<br>(2,274-4,962) | 3,351.40 ± 4,078.38<br>(721-10,533)     |
|                 | Eosinophil (cells/μl)                       | 0 – 598.60                 | 126                       | 101.00 ± 2.83<br>(99-103)            | 1,335.75 ± 2,292.98<br>(168-4,775)     | 657.00 ± 337.99<br>(418-896)         | 178.67 ± 309.46<br>(0-536)           | 186.40 ± 215.53<br>(103-466)            |
|                 | Basophil (cells/μl)                         | 0 – 100.33                 | Not found                 | Not found                            | 74.50 ± 149.00<br>(0-298)              | Not found                            | Not found                            | Not found                               |
|                 | H:L ratio                                   | >0 – 1.47                  | 2.00                      | 1.24 ± 1.26<br>(0.36-2.13)           | 0.93 ± 0.56<br>(0.25-1.51)             | 0.86 ± 0.48<br>(0.53-1.20)           | 0.96 ± 0.52<br>(0.42-1.46)           | 1.59 ± 0.26<br>(1.37-2.00)              |
|                 | M:H ratio                                   | >0 – 2.73                  | 0.65                      | 1.26 ± 0.50<br>(0.90-1.62)           | 1.26 ± 0.62<br>(0.52-2.04)             | 1.15 ± 0.99<br>(0.45-1.85)           | 1.72 ± 0.75<br>(1.05-2.53)           | 0.30 ± 0.24<br>(0.12-0.69)              |
| Platelet        | Platelet count (X 10 <sup>3</sup> cells/μl) | 151.08 – 552.62            | 407                       | 405.50 ± 51.62<br>(369-442)          | 378.25 ± 64.08<br>(321-459)            | 406.50 ± 153.44<br>(298-515)         | 419.67 ± 52.08<br>(366-470)          | 118.40 ± 103.71<br>(22-143)             |
| Blood chemistry | BUN (mg/dl)                                 | 4.44 – 15.31               | 14                        | 7.35 ± 1.48                          | 9.27 ± 2.93<br>(6.6-12.0)              | 9.10 ± 2.75<br>(6.1-12.0)            | 6.50 ± 0.98<br>(5.4-7.3)             | 12.80 ± 2.00<br>(11.0-16.0)             |

|                            |             |      |                            |                            |                            |                             |                            |
|----------------------------|-------------|------|----------------------------|----------------------------|----------------------------|-----------------------------|----------------------------|
|                            |             |      | (6.3-8.4)                  |                            |                            |                             |                            |
| Creatinine (mg/dl)         | 0.90 – 1.89 | 1.57 | 1.11 ± 0.11<br>(1.04-1.19) | 1.39 ± 0.57<br>(0.91-2.11) | 1.28 ± 0.14<br>(1.14-1.42) | 1.41 ± 0.54<br>(1.02-2.03)  | 2.20 ± 0.33<br>(1.79-2.54) |
| ALT (U/L)                  | 0 – 2.11    | 37   | 1.50 ± 2.12<br>(0-3)       | 0.50 ± 0.57<br>(0-1)       | 1.83 ± 0.57<br>(2-3)       | 1.67 ± 0.58<br>(1-2)        | 5.75 ± 3.59<br>(3-11)      |
| ALP (U/L)                  | 0 – 306.92  | 29   | 88.00 ± 14.14<br>(78-98)   | 82.80 ± 34.35<br>(49-94)   | 83.67 ± 40.08<br>(50-128)  | 160.50 ± 122.15<br>(75-335) | 113.00 ± 28.08<br>(73-131) |
| Total serum protein (g/dl) | 6.81 – 9.91 | 8.3  | 8.65 ± 0.64<br>(3.4-3.5)   | 8.32 ± 0.87<br>(7.4-9.4)   | 8.30 ± 0.80<br>(7.5-9.1)   | 7.17 ± 0.50<br>(6.7-7.7)    | 5.57 ± 0.76<br>(5-6)       |

PCV: packed cell volume; RBC: red blood cells; MCV: mean corpuscular volume; MCHC: mean corpuscular hemoglobin concentrations; WBC: total white blood cells; H:L ratio: Heterophil to Lymphocyte ratio; M:H ratio: Monocyte to Heterophil ratio; BUN: blood urea nitrogen; ALT: alanine transaminase; ALP: alanine phosphatase.

**Table S11.** Biomarker concentrations (mean  $\pm$  SD) and statistical comparisons between calves that survived or succumbed to EEHV-HD using the Mann-Whitney U tests.

| <b>Biomarkers</b> | <b>Survived<br/>(N=2)</b> | <b>Died<br/>(N=3)</b> | <b>U statistic</b> | <b>P-value</b> |
|-------------------|---------------------------|-----------------------|--------------------|----------------|
| ROS (mg/l)        | 2.31 $\pm$ 0.09           | 2.11 $\pm$ 0.15       | 1                  | 0.386          |
| MDA (nmol/ml)     | 3.36 $\pm$ 0.11           | 3.68 $\pm$ 0.31       | 5.5                | 0.236          |
| Albumin (g/dl)    | 2.25 $\pm$ 0.35           | 2.15 $\pm$ 0.35       | 1                  | 0.698          |
| GPx (U/l)         | 1.53 $\pm$ 0.41           | 1.92 $\pm$ 0.39       | 5                  | 0.386          |
| Catalase (U/ml)   | 17.36 $\pm$ 6.85          | 28.29 $\pm$ 11.69     | 4                  | 0.773          |
| fGCM (ng/g)       | 52.03 (N=1)               | 36.98 $\pm$ 14.86     | 0                  | 0.540          |
